# Supplementary material for: Tuning Design Parameters of ICAM-1-Targeted 3DNA Nanocarriers to Optimize Pulmonary Targeting Depending on Drug Type
Source: MDPI journal article supplement (doi:10.3390/pharmaceutics14071496), 2022-07-19
Supplement: s1 [file s1]

# Supplementary Materials: Tuning Design Parameters of ICAM-1-Targeted 3DNA Nanocarriers to Optimize Pulmonary Targeting Depending on Drug Type

Nikša Roki, Melani Solomon, Jessica Bowers, Lori Getts, Robert C. Getts and Silvia Muro

**Table S1.** Parametric values of all anti-ICAM/3DNA injections.

| Formulation    | Properties & Parameters |                                             |                                   |                                    |                                                 |           |                              |                 |
|----------------|-------------------------|---------------------------------------------|-----------------------------------|------------------------------------|-------------------------------------------------|-----------|------------------------------|-----------------|
|                | Valency<br>(Ab/NC)      | Valency density<br>(Ab/ $\mu\text{m}^2$ NC) | Ab dose<br>( $\mu\text{g/kg}$ BW) | DNA dose<br>( $\mu\text{g/kg}$ BW) | 3DNA surface<br>( $\mu\text{m}^2/\text{kg}$ BW) | NCs/kg BW | Intercalation<br>Sites/kg BW | Free<br>Arms/BW |
| <b>4L 3DNA</b> |                         |                                             |                                   |                                    |                                                 |           |                              |                 |
| Anti-ICAM (a)  | 13                      | 142.8                                       | 69                                | 400                                | 19E+11                                          | 21.5E+12  | 1.1E+17                      | 6.6E+15         |
| Anti-ICAM (b)  | 46                      | 505.5                                       | 249                               | 400                                | 19E+11                                          | 21.5E+12  | 1.1E+17                      | 5.8E+15         |
| Anti-ICAM (c)  | 80                      | 879.1                                       | 415                               | 400                                | 19E+11                                          | 21.5E+12  | 1.1E+17                      | 5.0E+15         |
| Anti-ICAM (d)  | 80                      | 879.1                                       | 249                               | 240                                | 12E+11                                          | 12.9E+12  | 6.4E+16                      | 3.0E+15         |
| Anti-ICAM (e)  | 80                      | 879.1                                       | 42                                | 40                                 | 1.9E+11                                         | 2.2E+12   | 1.1E+16                      | 5.0E+14         |
| <b>2L 3DNA</b> |                         |                                             |                                   |                                    |                                                 |           |                              |                 |
| Anti-ICAM (a)  | 6                       | 545.5                                       | 250                               | 400                                | 22E+11                                          | 194E+12   | 1.1E+17                      | 5.8E+15         |
| Anti-ICAM (b)  | 14                      | 1272.7                                      | 625                               | 400                                | 22E+11                                          | 194E+12   | 1.1E+17                      | 4.1E+15         |
| Anti-ICAM (c)  | 14                      | 1272.7                                      | 63                                | 40                                 | 2.2E+11                                         | 19.4E+12  | 1.1E+16                      | 4.1E+14         |

Ab = antibody; BW = body weight, NC = nanocarrier.

**Table S2.** Blood distribution for anti-ICAM/3DNA and control formulations.

| Formulation                             | % ID in Blood  |                |                |                |                |
|-----------------------------------------|----------------|----------------|----------------|----------------|----------------|
|                                         | 1 min          | 5 min          | 15 min         | 30 min         | 60 min         |
| <b>4L 3DNA</b>                          |                |                |                |                |                |
| No Ab                                   | 53.3 $\pm$ 1.9 | 4.7 $\pm$ 0.7  | 14.3 $\pm$ 0.7 | 2.2 $\pm$ 0.2  | 7.3 $\pm$ 2.1  |
| IgG control (i) <sup>21.5</sup>         | 41.9 $\pm$ 2.9 | 17.2 $\pm$ 0.4 | 31.2 $\pm$ 1.4 | 23.5 $\pm$ 1.0 | 28.6 $\pm$ 2.2 |
| Anti-ICAM <sub>13</sub> <sup>21.5</sup> | 21.8 $\pm$ 1.9 | 3.1 $\pm$ 0.1  | 1.7 $\pm$ 0.3  | 2.4 $\pm$ 0.1  | 2.3 $\pm$ 0.2  |
| Anti-ICAM <sub>46</sub> <sup>21.5</sup> | 17.6 $\pm$ 2.9 | 4.0 $\pm$ 0.3  | 2.7 $\pm$ 0.6  | 3.3 $\pm$ 0.4  | 3.0 $\pm$ 0.2  |
| Anti-ICAM <sub>80</sub> <sup>21.5</sup> | 11.2 $\pm$ 1.0 | 3.6 $\pm$ 0.1  | 4.3 $\pm$ 0.3  | 3.4 $\pm$ 0.5  | 2.5 $\pm$ 0.2  |
| Anti-ICAM <sub>80</sub> <sup>12.9</sup> | 13.4 $\pm$ 1.5 | ND             | 3.5 $\pm$ 0.3  | 3.1 $\pm$ 0.4  | 2.6 $\pm$ 0.1  |
| Anti-ICAM <sub>80</sub> <sup>2.2</sup>  | 20.7 $\pm$ 4.3 | 5.3 $\pm$ 0.8  | 3.3 $\pm$ 0.6  | 2.6 $\pm$ 0.5  | 2.7 $\pm$ 0.3  |
| <b>2L 3DNA</b>                          |                |                |                |                |                |
| No Ab                                   | 57.8 $\pm$ 7.0 | 28.5 $\pm$ 2.6 | 12.4 $\pm$ 1.3 | ND             | 8.2 $\pm$ 0.6  |
| IgG control (ii) <sup>194</sup>         | 55.3 $\pm$ 1.9 | 33.8 $\pm$ 0.9 | 30.6 $\pm$ 2.1 | ND             | 34.2 $\pm$ 1.4 |
| Anti-ICAM <sub>6</sub> <sup>194</sup>   | 31.2 $\pm$ 2.9 | 4.7 $\pm$ 0.9  | 4.2 $\pm$ 0.6  | 3.1 $\pm$ 0.3  | 2.5 $\pm$ 0.3  |
| Anti-ICAM <sub>14</sub> <sup>194</sup>  | 18.1 $\pm$ 2.5 | 6.1 $\pm$ 0.3  | 4.5 $\pm$ 0.2  | 4.0 $\pm$ 0.3  | 3.8 $\pm$ 0.1  |
| Anti-ICAM <sub>14</sub> <sup>19.4</sup> | 25.0 $\pm$ 4.1 | 4.5 $\pm$ 0.9  | 2.7 $\pm$ 0.0  | 2.8 $\pm$ 0.5  | 2.2 $\pm$ 0.3  |

Ab = antibody; % ID = percentage of the injected dose; ND = not determined. Data are mean  $\pm$  S.E.M. The subscript on the antibody name represents the targeting valency (antibody molecules per nanocarrier) shown in Table 1. The superscript is the dose concentration (number of nanocarriers per kg of body weight). All values must be multiplied by  $10^{12}$ . (i) 4L IgG/3DNA control contained 0 anti-ICAM molecules (targeting valency 0) and 46 IgG molecules/NC. (ii) 2L IgG/3DNA control contained 0 anti-ICAM molecules (targeting valency 0) and 6 IgG molecules/NC.

**Table S3.** Organ distribution for anti-ICAM/3DNA and control formulations.

| Formulation                             | % ID in Organ |         |          |          |         |
|-----------------------------------------|---------------|---------|----------|----------|---------|
|                                         | Heart         | Kidneys | Liver    | Lungs    | Spleen  |
| <b>4L 3DNA</b>                          |               |         |          |          |         |
| No Ab                                   | 0.1±0.0       | 3.2±0.7 | 20.8±1.3 | 0.5±0.1  | 1.0±0.1 |
| IgG control (i) <sup>21.5</sup>         | 0.1±0.0       | 1.1±0.1 | 50.2±2.0 | 0.4±0.1  | 2.2±0.1 |
| Anti-ICAM <sub>13</sub> <sup>21.5</sup> | 0.2±0.0       | 1.3±0.1 | 45.8±1.3 | 14.5±1.1 | 4.7±0.4 |
| Anti-ICAM <sub>46</sub> <sup>21.5</sup> | 0.4±0.0       | 2.6±0.3 | 40.2±1.7 | 18±1.0   | 3.5±0.3 |
| Anti-ICAM <sub>80</sub> <sup>21.5</sup> | 0.5±0.0       | 3.2±0.3 | 35.5±0.8 | 18.6±0.5 | 3.0±0.2 |
| Anti-ICAM <sub>80</sub> <sup>12.9</sup> | 0.5±0.0       | 2.8±0.2 | 32.7±2.4 | 21.1±1.4 | 3.5±0.6 |
| Anti-ICAM <sub>80</sub> <sup>2.2</sup>  | 0.3±0.0       | 1.9±0.0 | 39.2±1.1 | 18.4±0.8 | 3.6±0.3 |
| <b>2L 3DNA</b>                          |               |         |          |          |         |
| No Ab                                   | 0.2±0.0       | 2.4±0.2 | 20.6±1.1 | 0.5±0.1  | 1.3±0.1 |
| IgG control (ii) <sup>194</sup>         | 0.2±0.1       | 1.6±0.2 | 46.2±1.2 | 0.6±0.0  | 1.8±0.2 |
| Anti-ICAM <sub>6</sub> <sup>194</sup>   | 0.4±0.0       | 2.2±0.1 | 37.5±1.1 | 18.4±0.7 | 4.6±0.2 |
| Anti-ICAM <sub>14</sub> <sup>194</sup>  | 0.5±0.0       | 4.3±0.2 | 39.2±2.3 | 13±0.3   | 3.5±0.1 |
| Anti-ICAM <sub>14</sub> <sup>19.4</sup> | 0.3±0.0       | 1.9±0.1 | 34.3±2.3 | 19.6±1.3 | 3.3±0.6 |

Ab = antibody; % ID = percentage of the injected dose; ND = not determined. Data are mean ± S.E.M. The subscript on the antibody name represent the targeting valency (antibody molecules per nanocarrier) shown in Table 1. The superscript is the dose concentration (number of nanocarriers per kg of body weight). All values must be multiplied by 10<sup>12</sup>. (i) 4L IgG/3DNA control contained 0 anti-ICAM molecules (targeting valency 0) and 46 IgG molecules/NC. (ii) 2L IgG/3DNA control contained 0 anti-ICAM molecules (targeting valency 0) and 6 IgG molecules/NC.

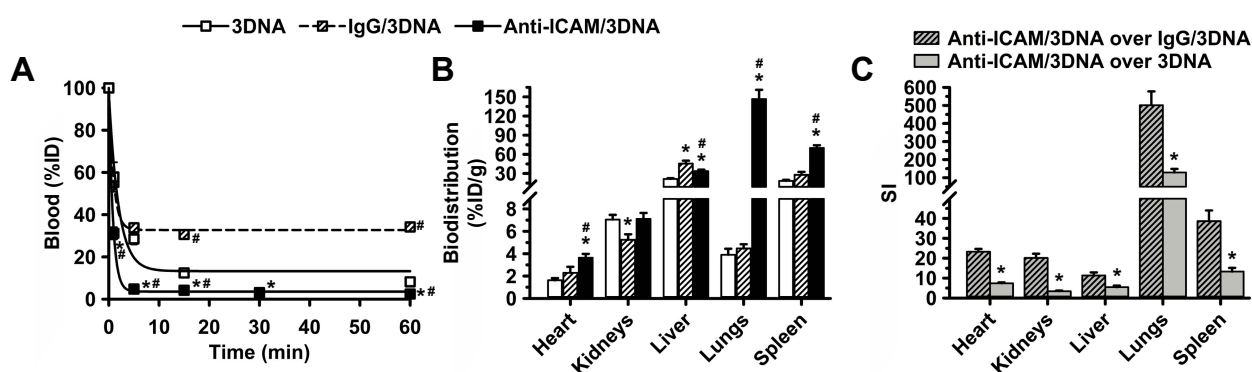

**Figure S1.** Biodistribution of 2L anti-ICAM/3DNA. <sup>125</sup>I-anti-ICAM/3DNA, control <sup>125</sup>I-IgG/3DNA, or control <sup>125</sup>I-3DNA were i.v. injected in C57BL/6 mice. Organs and blood radioactive content and weight were determined at (A) the indicated times or (B,C) 60 min after injection, to calculate: (A) the percentage of the injected dose in blood (% ID), (B) % ID per gram of organ (% ID/g) to compare organs of different weight, and (C) the specificity index (SI), which represents the organ-to-blood ratio of the targeted formulation over the non-targeted formulation (see Experimental Section). Data are mean ± S.E.M. \* Compares either antibody/3DNA vs. 3DNA alone; # compares anti-ICAM/3DNA vs. IgG/3DNA; (*p* < 0.05 by Student's *t*-test).

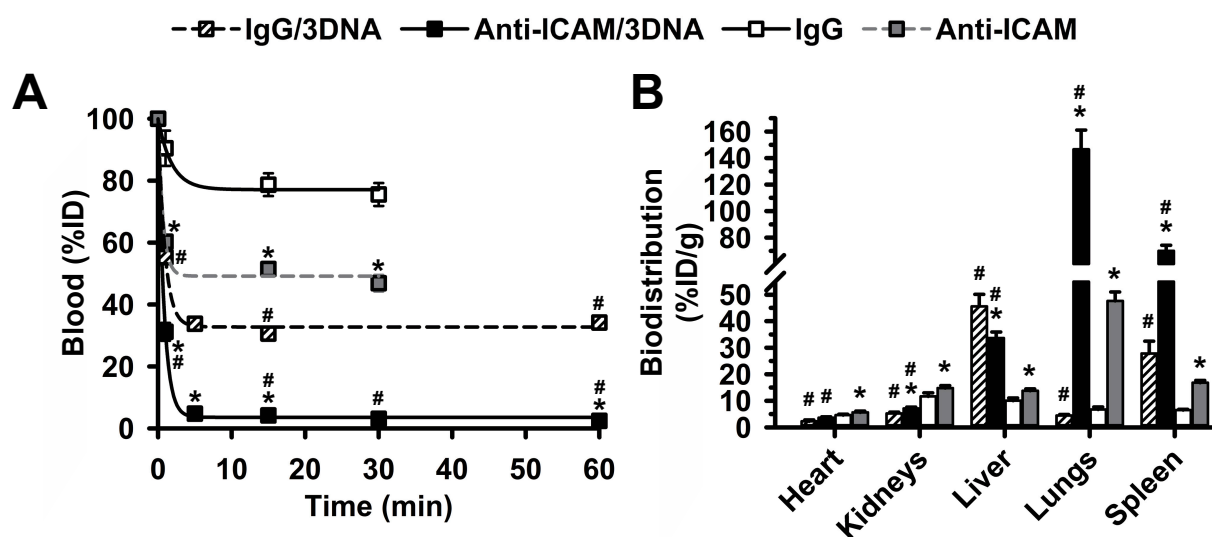

**Figure S2. Biodistribution of 2L anti-ICAM/3DNA vs. anti-ICAM.**  $^{125}\text{I}$ -anti-ICAM/3DNA, control  $^{125}\text{I}$ -IgG/3DNA, or corresponding antibodies ( $^{125}\text{I}$ -IgG or  $^{125}\text{I}$ -anti-ICAM) were i.v. injected in C57BL/6 mice. Organs and blood radioactive content and weight were determined at (A) the indicated times or (B) 60 min after injection for 2L 3DNA formulations and 30 min after injection for antibodies, to calculate: (A) the percentage of the injected dose in blood (% ID), and (B) % ID per gram of organ (% ID/g) to compare organs of different weight. Data are mean  $\pm$  S.E.M. \* Compares anti-ICAM formulations vs. corresponding IgG counterparts; # compares antibody/3DNA vs. corresponding Ab counterparts; ( $n \geq 3$ ;  $p < 0.05$  by Student's  $t$ -test).
